# Supplementary material for: Antibacterial Activity and Iron Release of Organic-Inorganic Hybrid Biomaterials Synthesized via the Sol-Gel Route
Source: MDPI journal article supplement (doi:10.3390/app11199311), 2021-10-07
Supplement: s1 [file s1]

Article

# Antibacterial Activity and Iron Release of Organic-Inorganic Hybrid Biomaterials Synthesized via the Sol-Gel Route

Michelina Catauro <sup>1,\*</sup>, Ylenia D'Errico <sup>1</sup>, Antonio D'Angelo <sup>1</sup>, Ronald J. Clarke <sup>2</sup> and Ignazio Blanco <sup>3</sup>

<sup>1</sup> Department of Engineering, University of Campania “Luigi Vanvitelli”, Via Roma 29, I-813031 Aversa, Italy; [ylenia.derrico@yahoo.it](mailto:ylenia.derrico@yahoo.it) (Y.D.); [antonio.dangelo@unicampania.it](mailto:antonio.dangelo@unicampania.it) (A.D.)

<sup>2</sup> School of Chemistry, University of Sydney, Eastern Avenue, Sydney NSW 2006, Australia; [ronald.clarke@sydney.edu.au](mailto:ronald.clarke@sydney.edu.au)

<sup>3</sup> Department of Civil Engineering and Architecture and UdR-Catania Consorzio INSTM, University of Catania, 6 Viale Andrea Doria, 95125 Catania, Italy; [iblanco@unict.it](mailto:iblanco@unict.it)

\* Correspondence: [michelina.catauro@unicampania.it](mailto:michelina.catauro@unicampania.it).

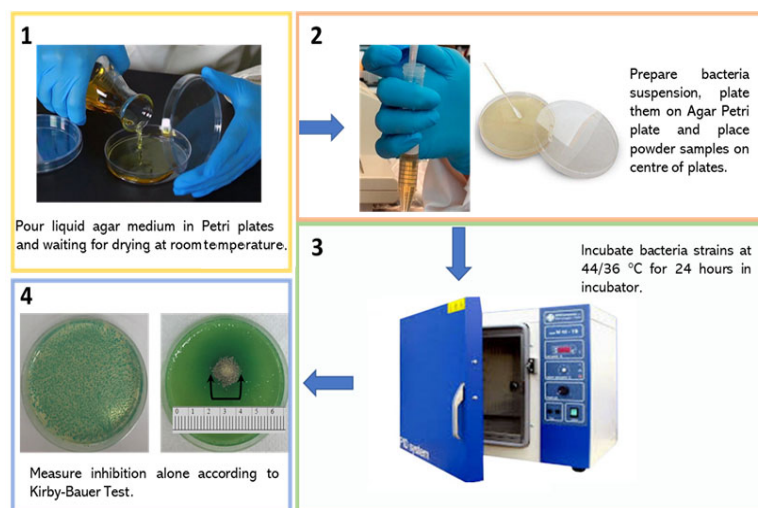

**Figure S1.** Flow-chart of antibacterial detection.

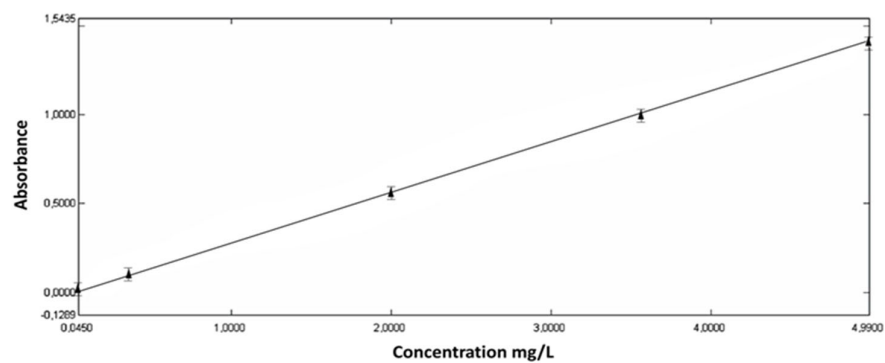

Figure S2. Calibration curve based on the concentration of  $\text{Fe}^{2+}$  ( $r^2=0.9973$ ).

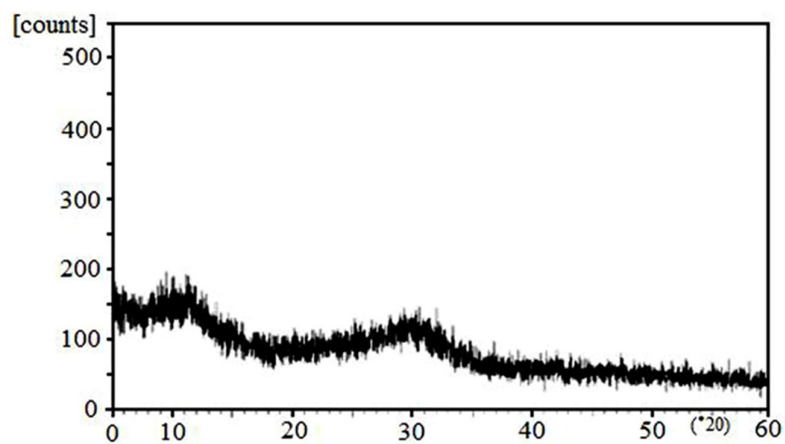

Figure S3. XRD of sample before soaked in SBF.

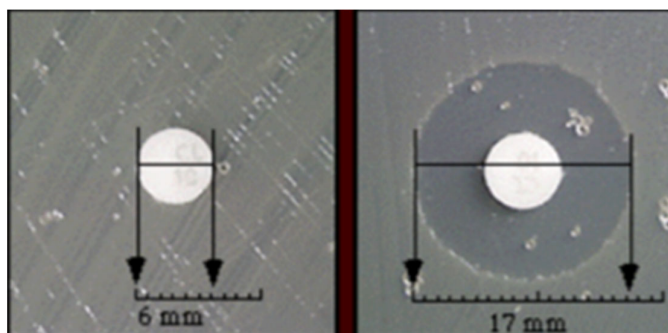

Figure S4. Antimicrobial test performed by the Kirby-Bauer technique.
